1 **Full Title: Impact of electronic medical records on healthcare**  
2 **delivery in Nigeria: A Review**

3 Short Title: Electronic medical records on healthcare delivery in Nigeria

4  
5 Oreoluwa Olukorode<sup>1</sup>, Oluwakorede Joshua Adedeji<sup>2</sup>, Adetayo Adetokun<sup>3</sup>, Ajibola Ibraheem  
6 Abioye<sup>4</sup>

7  
8  
9 <sup>1</sup>College of Health Sciences, University of Ilorin, Ilorin, Kwara State, Nigeria

10 <sup>2</sup>Faculty of Pharmaceutical Sciences, University of Ilorin, Ilorin, Kwara State, Nigeria

11 <sup>3</sup>College of Medicine, University of Maiduguri, Maiduguri Borno State, Nigeria.

12 <sup>4</sup>Stats Clinic, Barrington RI, USA

13

14 \* Oluwakorede Joshua Adedeji

15 E-mail: [oluwakorede2017@gmail.com](mailto:oluwakorede2017@gmail.com) (OJA)

16

17 All authors contributed equally to this work.

18

19

20

21

22

23

24

25

26

## 27 **Abstract**

28  
29 Electronic medical records (EMRs) have great potential to improve healthcare processes and  
30 outcomes. They are increasingly available in Nigeria, as in many developing countries. The  
31 impact of their introduction has not been well studied. We sought to synthesize the evidence  
32 from primary studies of the effect of EMRs on data quality, patient-relevant outcomes and  
33 patient satisfaction. We identified and examined five original research articles published up to  
34 May 2023 in the following medical literature databases: PUBMED/Medline, EMBASE, Web of  
35 Science, African Journals Online and Google Scholar. Four studies examined the influence of the  
36 introduction of or improvements in the EMR on data collection and documentation. The pooled  
37 percentage difference in data quality after introducing or improving the EMR was 142% (95%  
38 CI: 82% to 203%,  $p$ -value < 0.001). There was limited heterogeneity in the estimates ( $I^2 = 0\%$ ,  $p$ -  
39 heterogeneity = 0.93) and no evidence suggestive of publication bias. The 5<sup>th</sup> study assessed  
40 patient satisfaction with pharmacy services following the introduction of the EMR but neither  
41 had a comparison group nor assessed patient satisfaction before EMR was introduced. We  
42 conclude that the introduction of EMR in Nigerian healthcare facilities meaningfully increased  
43 the quality of the data.

## 44 **Author Summary**

45 Electronic medical records, or EMRs, offer the potential to improve healthcare in many developing  
46 nations, including Nigeria. The actual impact of these digital records hasn't gotten enough  
47 attention, despite their growing availability. Our goal in doing this review was to compile and  
48 evaluate primary study data on the effects of EMRs on patient satisfaction, patient-related  
49 outcomes, and data quality in Nigeria. After searching through medical literature databases, we  
50 found five original research publications up to May 2023 that were suitable for our study. The

51 impact of EMR implementation or upgrades on data collection and documentation was examined  
52 in four of these studies, while patient satisfaction with pharmacy services following EMR adoption  
53 was evaluated in the fifth study. Although the included studies did not quantitatively assess the  
54 impact of EMR adoption on patient satisfaction, we were able to conclude from the studies that  
55 the introduction of EMR in Nigerian healthcare facilities meaningfully increased the quality of the  
56 data

## 57 **Introduction**

58 Electronic medical records (EMRs) are extensively used in developed countries but their  
59 adoption in developing countries has been slow [1]. According to a survey conducted by the  
60 World Health Organization, 114 countries are presently developing national electronic medical  
61 record systems due to an increasing awareness that a more robust health information technology  
62 (HIT) system is essential for delivering superior healthcare at reduced expenses [2]. The  
63 adoption of EMR in these countries has been hindered by implementation, maintenance, and lack  
64 of required computer skills among healthcare professionals [3].  
65 The impact of the introduction of the EMRs has not been well studied. Most of the published  
66 literature have been perspective papers and reviews [4–6], case studies describing the practical  
67 experiences of hospitals setting up EMRs [7–10], primary studies exploring the barriers  
68 hindering their adoption [1,11–15] and studies leveraging EMRs for research [16–19]. Several  
69 primary studies have however assessed the impact of EMRs on patient-relevant outcomes [8,20–  
70 25], but no reviews have synthesized the evidence from them. The magnitude or direction of the  
71 impact of EMRs on these outcomes therefore remains unclear.

72 The main objective of this review is to assess the impact of the introduction and use of EMRs in  
73 healthcare facilities in Nigeria on patient-relevant outcomes. We will thus synthesize the  
74 evidence from studies of patient waiting time, patient satisfaction and health outcomes.

75

## 76 **Methods**

77 The guidelines from the Preferred Reporting Items for Meta-analysis, and Systematic Reviews  
78 (PRISMA) guidelines were used in the design, analysis, and reporting of this study [26].

## 79 **Systematic Search**

80 We conducted a systematic search of medical literature databases in May 2023. The search  
81 included PubMed/Medline (U.S. National Library of Medicine), Embase (Elsevier), Web of  
82 Science and African Journals Online (AJOL). The search was based on a combination of  
83 keywords and Medical Subject Heading (MeSH) terms denoting “medical records” and  
84 “Nigeria” were used. The search was not restricted by year of publication, study design or by  
85 language. Hand-searching of the reference lists of included articles, related review papers, and  
86 the first 500 Google Scholar search hits were also reviewed for additional relevant papers.

## 87 **Selection of studies**

88 Duplicate citations were removed and the title and abstract of identified studies were reviewed  
89 by at least two researchers working independently (OO, OA and AA). Discrepancies were  
90 resolved by a third author (AIA). The full text of qualifying articles were then reviewed in a  
91 similar manner. To be eligible for inclusion, studies had to be published in English Language,  
92 have assessed the impact of Electronic medical records, and conducted in Nigeria. Studies were  
93 excluded if they were systematic reviews, cross-sectional studies, case reports, and duplicate  
94 studies. Rayyan.ai was used to manage study selection [27].

## 95 **Data extraction**

96 Data were extracted from the eligible studies using a data extraction sheet prepared by  
97 investigators. Data on study designs, population characteristics, covariates, study details,  
98 measures of association and their corresponding confidence intervals (CI), standard errors or  $p$ -  
99 values were extracted from the included studies.

## 100 **Study quality and risk of bias**

101 Included studies were critically appraised for the risk of bias. The risk of bias was assessed using  
102 the Cochrane Collaboration's revised tools for assessing the risk of bias in non-randomized studies  
103 [28]. No inclusion or analysis decisions were made based on the risk of bias.

## 104 **Meta-analysis**

105 The ratio of the percentage in data quality was estimated and standard errors obtained from  $p$ -  
106 values [29]. Pooled estimates of the log ratio of means for data quality were obtained from random  
107 effects meta-analysis based on the restricted maximum likelihood since  $\geq 3$  studies reported  
108 estimates for the same intervention-outcome relationship [30]. The random effects approach was  
109 selected *a priori* because it accounts for variability in the true intervention effect [31]. The log  
110 ratio of means is a metric of the percentage difference and was preferred to the weighted and  
111 standardized mean difference measures as it is easily interpretable [32]. Heterogeneity was  
112 assessed using the  $I^2$  statistic to explore the degree of variability between the studies and explored  
113 in meta-regression.  $I^2$  was regarded as minimal if 0-40%, moderate if >40-60%, substantial if 60-  
114 80% and considerable if >80% [33]. Publication bias was evaluated by visual inspection of funnel  
115 plots and the Egger's test [34]. Meta-analysis was conducted using the Metafor package [35] in  
116 RStudio [36]  $P$ -values are 2-sided, and significance was set at  $p$ -value < 0.05.

117

118

## 119 Results

### 120 Summary of included studies

121 We found five studies (**Fig 1**) that specifically analyzed the influence of EMR on healthcare  
122 outcomes in Nigerian hospitals. There was one cross-sectional study [23] and four longitudinal  
123 studies [20–22,24]. These studies were all conducted in public secondary and tertiary hospitals  
124 with the sample population ranging from doctors and nurses to patients. The risk of bias in the  
125 studies were low risk for two studies[20,21], some concern for one study [22], and high risk for  
126 two studies[23,24]. The search details are shown in Table 1 with the summary of included  
127 studies shown in Table 2.

128 **Fig 1: PRISMA flow diagram**

129

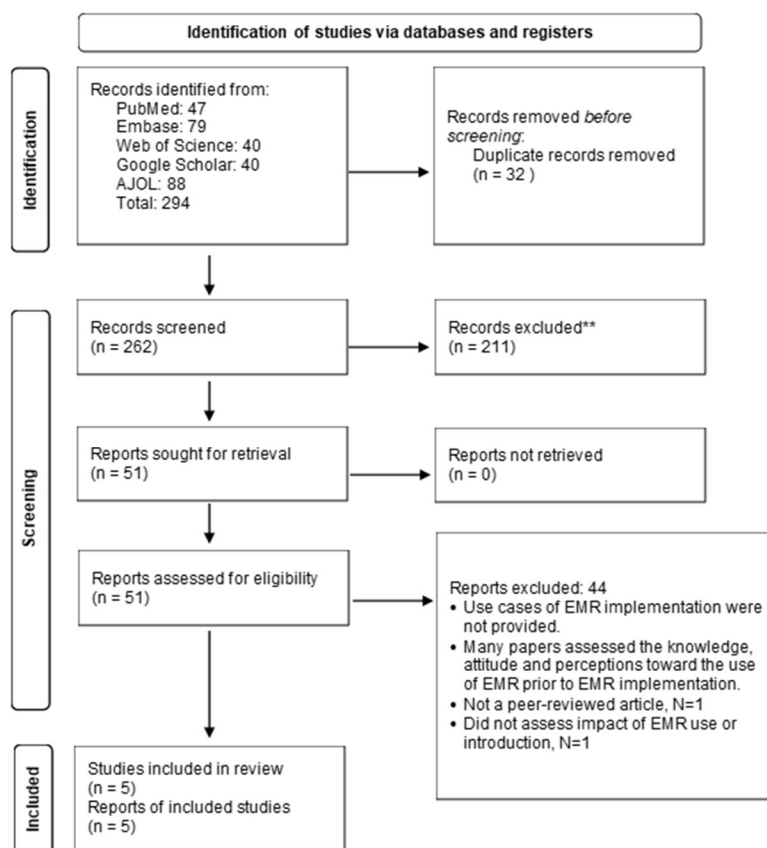

130

131 **Table 1: Search Details**

| Database       | Search terms                                                                                                                                                                                | Hits – 5 <sup>th</sup> May, 2023 |
|----------------|---------------------------------------------------------------------------------------------------------------------------------------------------------------------------------------------|----------------------------------|
| PubMed         | ((((electronic[Text] OR digital[Text]) AND (medical records[Text] OR health records[Text])) OR ("medical records systems, computerized"[MeSH Terms])) AND (Nigeria[Text] OR Nigeria[Mesh])) | 47                               |
| Embase         | ('electronic medical record'/exp OR 'electronic medical record') AND ('nigeria'/exp OR Nigeria OR 'nigerian'/exp OR Nigerian)                                                               | 79                               |
| Web of Science | (electronic health records (Title) or electronic health records (Abstract)) AND (Nigeria (Title) or Nigeria (Abstract))                                                                     | 40                               |
| Google Scholar | ("electronic medical records" OR "digital medical records") AND "nigeria"                                                                                                                   | 40                               |
| AJOL           | ("electronic medical records" OR "digital medical records") AND "nigeria"                                                                                                                   | 88                               |
| Total          |                                                                                                                                                                                             | 294                              |

132

133 **Table 2: Summary of Included Studies**

| Authors           | Study Purpose                                                                    | Study Design                           | Study Location                                                                                             | Population | Outcomes measured        | Findings                                                                                                                                                                                                                |
|-------------------|----------------------------------------------------------------------------------|----------------------------------------|------------------------------------------------------------------------------------------------------------|------------|--------------------------|-------------------------------------------------------------------------------------------------------------------------------------------------------------------------------------------------------------------------|
| Adereti 2019 [21] | To compare the quality of documentation using electronic- vs. paper-based SNCPs. | Longitudinal, quasi-experimental study | Public tertiary health facility in north central region with >500 bed capacity, 608 nursing care personnel | 32 nurses  | Quality of documentation | Electronic-based SNCP:<br>Pre-test: 0%<br>1 <sup>st</sup> post-test: 72%<br>2 <sup>nd</sup> post-test, 54%<br><br>Paper-based SNCP:<br>Pre-test: 5%<br>1 <sup>st</sup> post-test: 31%<br>2 <sup>nd</sup> post-test: 32% |

|                      |                                                                                                                                        |                                        |                                                                             |                                               |                                                   |                                                                                                                      |
|----------------------|----------------------------------------------------------------------------------------------------------------------------------------|----------------------------------------|-----------------------------------------------------------------------------|-----------------------------------------------|---------------------------------------------------|----------------------------------------------------------------------------------------------------------------------|
| Aniekwe 2023 [24]    | To assess the effect of implementing an electronic health information exchange (HIE) on the quality of HIV viral load data in Nigeria. | Longitudinal, quasi-experimental study | Nigeria, country-wide                                                       | 30 Healthcare facilities                      | Data completeness<br><br>Data validity or quality | Pre-test: 47%<br>6 months: 67%<br><i>P</i> -value < 0.01<br>Pre-test: 90%<br>6 months: 91%<br><i>P</i> -value < 0.01 |
| Hassan 2018 [23]     | To assess patients' satisfaction with EMR at the hospital's pharmacy                                                                   | Cross-sectional study                  | Federal Medical Centre, Keffi, Nassarawa State                              | 300 patients, >18 years; 142 male, 158 female | Satisfaction with pharmacy services received      | 46% were satisfied with pharmacy services under EMR platform while 54% were not satisfied.                           |
| Kana 2019 [20]       | To assess the feasibility of using an electronic growth monitoring system to monitor infant growth                                     | Longitudinal Study                     | Child Welfare Clinic of Barau Dikko Teaching Hospital, Kaduna, Kaduna State | 2789 infant records                           | Completeness of Data collection                   | 89% had complete data; 68% had at least one follow-up visit;                                                         |
| Olagundoye 2021 [22] | To assess the effect of improving EMR using electronic diagnostic terminology instead of the manual coding process                     | Longitudinal, quasi-experimental study | 26 General hospitals in Lagos state                                         | 52 clinical coders                            | Coding Accuracy or data quality                   | Pre-test: 76.3%<br>Post-test: 96.7%                                                                                  |



## 135 **Data quality**

136 Four studies examined the influence of the introduction of [20,21,24] or improvements in [22]  
137 the EMR on data collection and documentation, with important implications for public health.  
138 The first, a longitudinal study [20], examined the feasibility of using the Child Electronic Growth  
139 Monitoring System (CEGROMS) to monitor the growth of infants in the Child Welfare Clinic of  
140 Barau Dikko Teaching Hospital, Kaduna, Kaduna State as part of the Kaduna Infant  
141 Development (KID) Birth Cohort Study [37] over nine months. The CEGROMS system included  
142 data capture forms, electronic tablets, and desktop computer linked to a cloud server. It collected  
143 data on child growth parameters such as head circumference, length, and birth weight.  
144 Participants were enrolled during birth or immunization visits and followed up during growth  
145 monitoring visits.  
146 3,152 infants were assessed in this study. Of these, 89% had complete data and 68% had at least  
147 one follow-up visit. Data was more likely to be complete if infants were delivered at a health  
148 facility (OR=19.2; 95% CI: 13.7, 26.9), or were born to tertiary-educated mothers (OR=3.54;  
149 95% CI: 2.69, 4.67). The odds of completing at least one follow-up visit were also greater for  
150 infants of tertiary-educated mothers (OR=1.33; 95% CI: 1.06, 1.51).  
151 The second study [21] assessed the impact of utilizing electronic and paper-based Standardized  
152 Nursing Care Plans (SNCPs) on the quality of nurses' documentation at a government-owned  
153 tertiary health facility. The design of the study was a pre-post quasi-experimental study  
154 comparing a new electronic SNCP to the existing paper-based SNCP. Whether hospital wards  
155 would use electronic or paper-based SNCP was determined by the hospital management. One  
156 adult medical wards using each of paper or electronic SNCPs was purposively selected for  
157 inclusion in the study. These wards had 32 nurses on staff and an average monthly admission of  
158 34 patients.

159 Nursing documents for patients admitted for  $\geq 4$  days in these wards were assessed for pre-test  
160 (N=67), and first and second post-tests (N=68 each), 3 and 6 months later respectively. An  
161 instrument for assessing the quality of nursing diagnoses and documentation were used at each  
162 time point [38]. Following the introduction of SNCPs, there was a noticeable enhancement in  
163 documentation quality within both wards during the post-intervention period. While  
164 documentation quality in the electronic ward was good at 0% in the pretest, 72% in the first  
165 pretest and 54% in the second pretest, in the paper ward, it was 5% in the pretest, 31% in the first  
166 pretest and 32% in the second pretest, indicating a significant difference in the difference in  
167 documentation quality in both wards over time. This study underscores the crucial role of  
168 providing SNCPs in both electronic and paper formats in order to elevate the standard of nursing  
169 documentation.

170 The third study [24] assessed the impact of an automated Health Information Exchange (HIE)  
171 system on the validity and completeness of HIV viral load testing in healthcare facilities across  
172 Nigeria. The study design was longitudinal/quasi-experimental. The automated HIE system  
173 linked the EMR and the Laboratory Information Management Systems (LIMS) using APIs  
174 allowing the exchange of lab testing data. The validity of viral load data was assessed before the  
175 HIE was implemented and six months after. Three high-volume PCR labs and 30 treatment  
176 facilities were purposively selected for analysis.

177 The results indicated significant improvements in both data completeness and validity after the  
178 implementation of the automated HIE system. 15,226 records of specimens were analyzed at  
179 baseline and 18,022 records of specimens were analyzed six months later. Data completeness  
180 was defined as the percentage of observations with all the data regarding viral load testing,  
181 including the date and time the test was requested, specimen collected, tested, and so on. Data

182 completeness increased significantly from 47% before HIE implementation to 67% six months  
183 after implementation ( $P$ -value  $<0.01$ ). Data validity also increased from 90% before  
184 implementation to 91% after implementation ( $P$ -value  $<0.01$ ).

185 The fourth study [22] was a longitudinal quality improvement (QI) study that aimed to use the  
186 Plan-Do-Study-Act cycle framework to enhance the accuracy of coding using the International  
187 Classification of Diseases, 10th revision (ICD-10) for morbidity/mortality data at general  
188 hospitals in Lagos State. The specific objective was to increase the accuracy rate from 78.7% to  
189  $\geq 95\%$  between March 2018 and September 2018. Additionally, the study aimed to determine  
190 whether the electronic browsing tool could yield better coding accuracy compared to the  
191 traditional manual method. Thus, unlike the previous three studies that evaluated the introduction  
192 of EMR, this study studied improvements in the EMR.

193 The intervention involved introducing electronic diagnostic terminology software [39] and  
194 providing training to 52 clinical coders across the 26 general hospitals. The clinical coders were  
195 medical records personnel most of whom had a bachelor's degree or its equivalent and had been  
196 in service a median of 7 years. To evaluate the impact of the intervention, an end-of-training  
197 coding exercise was conducted to compare accuracy between the old method and the new  
198 approach. Accuracy was defined based on the extent of correctly coded diagnoses. Over the  
199 period from April 2018 to March 2019, the accuracy rates in the hospitals increased from 76.3%  
200 to 96.7%, exceeding the QI goals.

201 The pooled percentage difference in data quality after introducing or improving the EMR was  
202 123% (95% CI: 70% to 176%,  $p$ -value  $< 0.001$ ) based on three studies of data validity  
203 [21,22,24]. The summary of the risk of bias and forest plot are shown in Figs 2 & 3 respectively.  
204 There was limited heterogeneity in the estimates ( $I^2 = 0\%$ ,  $p$ -heterogeneity = 0.74). The funnel

205 plot (Fig 4) was however symmetrical and the  $p$ -value for Egger's test was 0.75. Meta-regression  
 206 was not done.

207 **Fig 2. Summary of risk of bias**

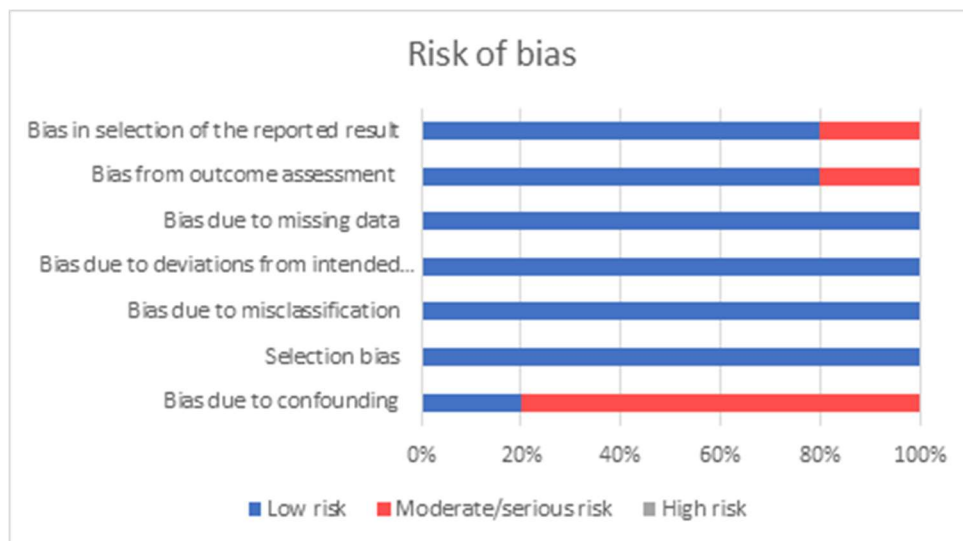

208

209 **Fig 3. Forest plot of the effect of introducing EMR on data quality**

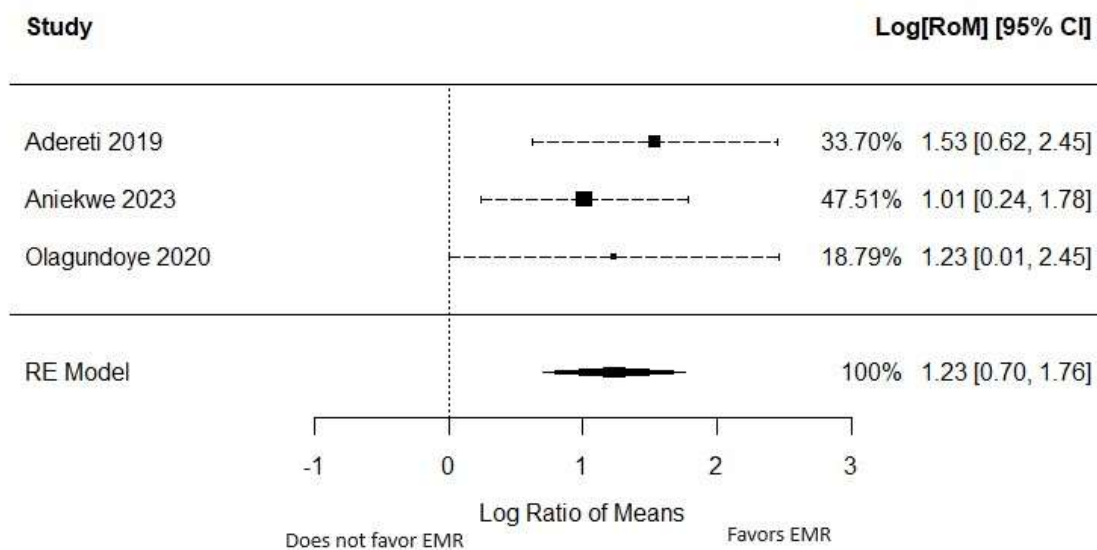

210

211

212

213 **Fig 4. Funnel plot for the effect of introducing EMR on data quality**

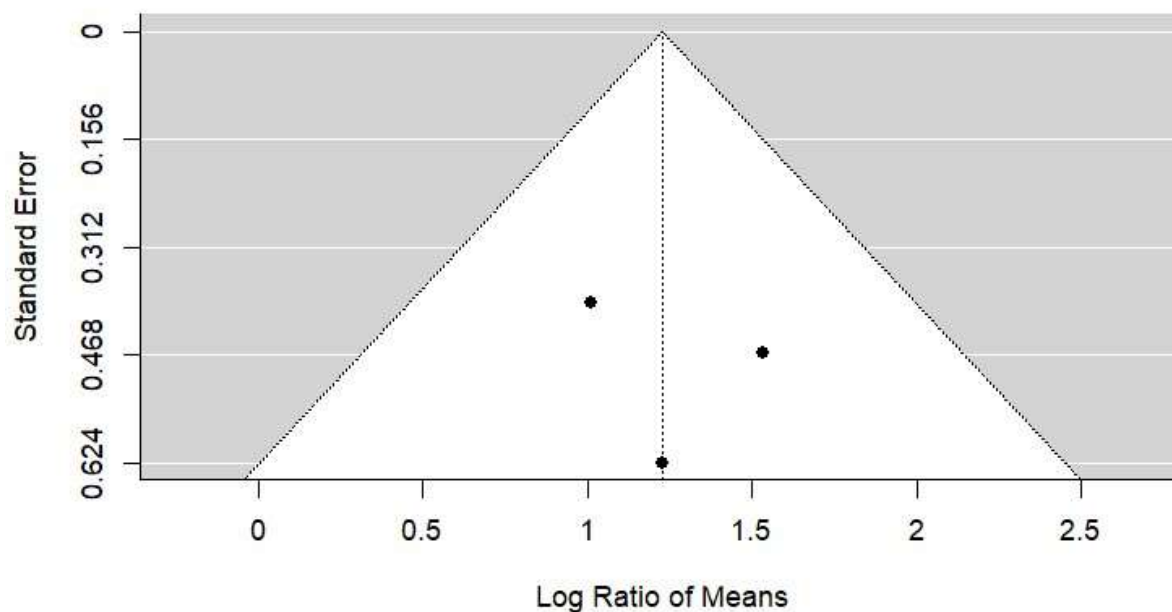

214

215

216 Taken together, we conclude that the introduction of quality improvements to EMR enhanced  
217 data completeness and validity.

## 218 **Patient care and satisfaction**

219 One study examined the impact of EMR on patient care and satisfaction [23]. The study had a

220 cross-sectional design and was conducted among 300 patients at the Federal Medical Centre,

221 Keffi, Niger State, with the aim of assessing patients' satisfaction with EMR implementation at

222 the hospital's pharmacy. The participants (142 female, 158 male) were selected using a simple

223 random sampling technique in which registered outpatients were the sampling frame. Using a

224 questionnaire designed and validated by the investigators, the participants were asked about their

225 satisfaction with the pharmacy services they accessed following the introduction of the EMR.

226 33% of the respondents believed that the EMR has improved services in the pharmacy

227 department while 38% believed otherwise; the rest were indifferent. Only 28% were satisfied  
228 with the time it took to wait for service. Overall, 46% of the participants were satisfied.  
229 Unfortunately, waiting time was not objectively assessed in this study. The studied parameters  
230 were also not evaluated at baseline for comparison. The study did not also include a baseline  
231 assessment or a control group for comparison. We are therefore unable to conclude whether the  
232 introduction of the EMR improved patient satisfaction or shortened patient waiting times.  
233

## 234 **Discussion**

235 The evidence with respect to the impact of EMR use in Nigeria is very scant. We reviewed five  
236 primary studies that have examined the use and impact of EMRs in Nigeria. These studies assessed  
237 medical record quality and patient satisfaction following the introduction and use of EMR.  
238 The EMR is central to the modernization of healthcare systems worldwide [40]. The  
239 transformative potential of EMRs lies in their ability to facilitate information management,  
240 streamline clinical workflows, and ultimately enhance patient care [41]. A striking facet that the  
241 studies unveil is the catalytic role of EMRs in mitigating errors resulting from incomplete or  
242 outdated information. The included studies have been examined in programs deploying EMR to  
243 strengthen public health programs [20], medical and nursing care [21,22] and laboratory testing  
244 [24]. The direction of our findings was similar – included studies consistently demonstrated that  
245 the EMR improved the quality of medical record data in Nigeria. We, thus, found that the  
246 introduction of the EMR improved data completeness by 123%.  
247 Developed countries have seized the potential of EMRs to revolutionize healthcare by facilitating  
248 seamless data exchange, improving clinical decision-making, and enhancing patient engagement  
249 [42]. However, there remain disparities in EMR adoption, particularly in regions such as sub-

250 Saharan Africa. Here, the challenges are manifold, encompassing not only technical hurdles but  
251 also socio-economic constraints and the digital divide in computer literacy among healthcare  
252 professionals [3]. These challenges are both emblematic of the complex digital landscape and  
253 unique to the local conditions of each developing country. For instance, it is incumbent upon any  
254 healthcare system to fortify its IT infrastructure to ensure seamless EMR operation. Ongoing  
255 training programs are also required to allow healthcare providers (HCPs) to operate the EMR  
256 applications with confidence and competence. There are also locally specific challenges such as  
257 epileptic power supply [43]. By fortifying IT infrastructure, fostering a culture of continuous  
258 learning, and providing robust support mechanisms, healthcare systems can navigate the intricacies  
259 of EMR implementation with a healthy amount of confidence.

260 Patient satisfaction, often deemed the bedrock of healthcare quality, reflects the synergy between  
261 medical expertise, operational efficiency, and the overall patient experience [44]. It is usually the  
262 result of reduced waiting times, enhanced information accessibility, and streamlined  
263 administrative processes. The transformation expected to be fostered by EMRs is not confined to  
264 operational efficiency; it extends to the very essence of healthcare—an essence deeply rooted in  
265 empathy, compassion, and patient-centricity [45]. HCPs would be afforded the time and tools to  
266 engage more closely with patients. The reduced administrative burden would pave the way for  
267 meaningful patient interactions, allowing HCPs to actively listen, educate, and engage with  
268 patients. It is noteworthy that HCPs in high-income countries believe that the EMR has actually  
269 increased administrative burden, though the actual impact on clinician burnout has not been  
270 rigorously studied [46]. Unfortunately, the reviewed studies did not rigorously evaluate the effect  
271 of introducing the EMR on patient satisfaction. Qualitative studies from Nigeria assessing patient  
272 and HCP satisfaction have had mixed outcomes [8,25], with the expectation that efficiency and

273 satisfaction would improve as HCPs gained more familiarity with the EMR technology and the  
274 clinical workflow was improved. Studies from the USA, Kuwait and Saudi Arabia have reported  
275 improved patient satisfaction following the introduction of EMRs [47,48]. The rollout of EMRs  
276 in Nigeria is recent and improvements in patient satisfaction and healthcare quality can be  
277 expected as clinicians become more adept in the use of these tools.

278 This study has noteworthy strengths and limitations. By focusing on a single country, we are able  
279 to sharply focus on country-specific issues and potentially propose a national research agenda for  
280 digital health. Our meta-analysis of the effect of the introduction of the EMR on data quality  
281 could potentially be useful for health systems in the country aiming to assess the value of the  
282 EMR. Private facilities were however not included in any of the primary studies, though they  
283 account for a substantial proportion of healthcare in Nigeria [49,50]. The timeframe of the  
284 studies was also not long enough to evaluate any long-term impacts on data quality.

285 Going forward, additional research may improve our understanding of the value of the EMR in  
286 healthcare delivery. These include studies assessing health professionals' readiness, impact on  
287 patient-relevant clinical outcomes in different clinical settings and a range of diagnoses, patient  
288 satisfaction using standard validated tools, objectively measured patient waiting time and quality  
289 indicators. It is important for the studies to carefully define the PICOS – participants, interventions,  
290 comparators, outcomes and study design [40]. It will also be important to ensure the applicability  
291 of collected data for clinical research and programs [51,52].

292

## 293 **Conclusion**

294 We systematically reviewed the evidence linking the introduction of EMRs to data quality and  
295 patient satisfaction. We found that data quality increased substantially following the introduction



296 of EMRs. We were unable to quantitatively assess the impact on patient satisfaction as there  
297 were too few studies and the included study did not have a rigorous design.

## 298 **Acknowledgements**

299 Nil

300

## 301 **References**

- 302 1. Akwaowo CD, Sabi HM, Ekpenyong N, Isiguzo CM, Andem NF, Maduka O, et al. Adoption  
303 of electronic medical records in developing countries—A multi-state study of the Nigerian  
304 healthcare system. *Front Digit Health*. 2022;4:239.
- 305 2. World Health Organization. Global diffusion of eHealth: making universal health coverage  
306 achievable: report of the third global survey on eHealth [Internet]. Geneva: World Health  
307 Organization; 2016 [cited 2023 May 11]. 156 p. Available from:  
308 <https://apps.who.int/iris/handle/10665/252529>
- 309 3. Akanbi MO, Ocheke AN, Agaba PA, Daniyam CA, Agaba EI, Okeke EN, et al. Use of  
310 Electronic Health Records in sub-Saharan Africa: Progress and challenges. *J Med Trop*.  
311 2012;14(1):1–6.
- 312 4. Boyinbode O, Toriola G. CloudeMR: a cloud based electronic medical record system. *Int J*  
313 *Hybrid Inf Technol*. 2015;8(4):201–12.
- 314 5. Funmilola A, Ozichi E. Development of an electronic medical record (EMR) system for a  
315 typical Nigerian hospital. *Development*. 2015;2(6).
- 316 6. Adedeji T, Fraser H, Scott P. Implementing Electronic Health Records in Primary Care  
317 Using the Theory of Change: Nigerian Case Study. *JMIR medical informatics. JMIR Med*  
318 *Inform*. 2022;11(10(8)):e33491.

- 319 7. Awokola BI, Abioye-Kuteyi EA, Otoru OO, Oyegbade OO, Awokola EO, Awokola OA, et  
320 al. Practical challenges of setting up an electronic medical record system in a Nigerian  
321 tertiary hospital: The Wesley Guild Hospital experience. *Middle East J Fam Med.*  
322 2012;10(2):37–42.
- 323 8. Chaplin B, Meloni S, Eisen G, Jolayemi T, Banigbe B, Adeola J, et al. Scale-up of  
324 networked HIV treatment in Nigeria: creation of an integrated electronic medical records  
325 system. *Int J Med Inf.* 2015;84(1):58–68.
- 326 9. Ogundipe O. Electronic Medical Record Keeping: Eleven Years Experience at Life Support  
327 Eye Clinic, Lagos, Nigeria. *Niger J Ophthalmol.* 2011;19(1):12–8.
- 328 10. Sawyer-George O, Friday JE. Adoption of Electronic Medical Records in Tertiary Health-  
329 Care Centers: A Survey of Federal Medical Centers in South-South Nigeria. *Asian J Inf Sci*  
330 *Technol AJIST.* 2023;13(1).
- 331 11. Ayanlade OS. Electronic Medical Record System as a central ICT tool for quality healthcare  
332 services: Nigeria as a case study. *Afr J Sci Technol Innov Dev.* 2018;10(2):147–57.
- 333 12. Onigbogi OO, Poluyi A, Poluyi C, Onigbogi M. Doctors' Attitude and Willingness to Use  
334 Electronic Medical Records at the Lagos University Teaching Hospital, Lagos, Nigeria.  
335 *Online J Public Health Inform.* 2018;10(2).
- 336 13. Adegbore AM, Omowumi AT. Factors Influencing Electronic Medical Record Systems  
337 Success in Selected Tertiary Healthcare Facilities in South-West, Nigeria. *Inf Impact J Inf*  
338 *Knowl Manag.* 2021;12(1):14–32.
- 339 14. Babale SM, Taiwo HA, Olasinde AA, Joshua I. Knowledge, attitude and perception of  
340 healthcare workers on use of electronic medical records in Ahmadu Bello University

- 341 teaching hospital, Zaria, Kaduna, Kaduna State Northwest Nigeria. *J Med Basic Sci Res.*  
342 2021;2(1):1–12.
- 343 15. Afolaranmi TO, Hassan ZI, Dawar BL, Wilson BD, Zakari AI, Bello KK, et al. Knowledge  
344 of electronic medical records system among frontline health care workers in Jos University  
345 teaching hospital, Plateau State Nigeria. *Int J Res Med Sci.* 2020;8(11):3837.
- 346 16. Njoku PO, Enomina M, Obehighe EE, Mbah IO, Okoro EO, Essen ME, et al. Pattern of non-  
347 communicable diseases seen in a tertiary hospital in Keffi, North Central Nigeria. *Niger J*  
348 *Cardiol.* 2019;16(1):60–5.
- 349 17. Odafe S, Torpey K, Khamofu H, Oladele E, Adedokun O, Chabikuli O, et al. Integrating  
350 cervical cancer screening with HIV care in a district hospital in Abuja, Nigeria. *Niger Med J*  
351 *J Niger Med Assoc.* 2013;54(3):176.
- 352 18. Akyala AI, Awayimbo JR, Elayo MI, Olugbade OT, Akabe EA, Akinyoade A. Severe Acute  
353 Respiratory Syndrome Coronavirus 2 (SARS-CoV-2) infection among health care workers in  
354 Nasarawa State, Nigeria: implications for infection prevention and control measures. *Pan Afr*  
355 *Med J.* 2020;37(Suppl 1).
- 356 19. Abayomi A, Osibogun A, Kanma-Okafor O, Idris J, Bowale A, Wright O, et al. Morbidity  
357 and mortality outcomes of COVID-19 patients with and without hypertension in Lagos,  
358 Nigeria: a retrospective cohort study. *Glob Health Res Policy.* 2021;6(1):1–8.
- 359 20. Kana MA, Ahmed J, Ashiru AY, Jibrin S, Sunday AD, Shehu K, et al. Child electronic  
360 growth monitoring system: an innovative and sustainable approach for establishing the  
361 Kaduna infant development (KID) study in Nigeria. *Paediatr Perinat Epidemiol.*  
362 2020;34(5):532–43.

- 363 21. Adereti CS, Olaogun AA. Use of Electronic and Paper-based Standardized Nursing Care  
364 Plans to Improve Nurses' Documentation Quality in a Nigerian Teaching Hospital. *Int J Nurs*  
365 *Knowl.* 2019 Oct;30(4):219–27.
- 366 22. Olagundoye O, van Boven K, Daramola O, Njoku K, Omosun A. Improving the accuracy of  
367 ICD-10 coding of morbidity/mortality data through the introduction of an electronic  
368 diagnostic terminology tool at the general hospitals in Lagos, Nigeria. *BMJ Open Qual.*  
369 2021;10(1):e000938.
- 370 23. Hassan A, Sabiu A, Ndom G, Amina Y, Ezekiel G. Patients' Satisfaction after Electronic  
371 Medical Records Implementation in a Tertiary Hospital in North Central Nigeria. *Ann Med*  
372 *Health Sci Res* Vol. 2018;8(1).
- 373 24. Aniekwe C, Cuffe K, Audu I, Nalda N, Ibezim B, Nnakwe M, et al. Assessing the effect of  
374 electronic health information exchange on the completeness and validity of data for  
375 measuring viral load testing turnaround time in Nigeria. *Int J Med Inf.* 2023;174:105059.
- 376 25. Abimbola IG. *Assessing Value Added in the Use of Electronic Medical Records in Nigeria.*  
377 *Walden University*; 2015.
- 378 26. Liberati A, Altman DG, Tetzlaff J, Mulrow C, Gøtzsche PC, Ioannidis JP, et al. The  
379 PRISMA statement for reporting systematic reviews and meta-analyses of studies that  
380 evaluate health care interventions: explanation and elaboration. *J Clin Epidemiol.*  
381 2009;62(10):e1–34.
- 382 27. Ouzzani M, Hammady H, Fedorowicz Z, Elmagarmid A. Rayyan—a web and mobile app for  
383 systematic reviews. *Syst Rev.* 2016;5:1–10.

- 384 28. Sterne JA, Hernán MA, Reeves BC, Savović J, Berkman ND, Viswanathan M, et al.  
385 ROBINS-I: a tool for assessing risk of bias in non-randomised studies of interventions. *bmj*.  
386 2016;355.
- 387 29. Higgins JP, Thomas J, Chandler J, Cumpston M, Li T, Page MJ, et al. *Cochrane handbook*  
388 for systematic reviews of interventions. John Wiley & Sons; 2019.
- 389 30. Gopalakrishnan S, Ganeshkumar P. Systematic reviews and meta-analysis: understanding the  
390 best evidence in primary healthcare. *J Fam Med Prim Care*. 2013;2(1):9.
- 391 31. Kontopantelis E, Reeves D. Performance of statistical methods for meta-analysis when true  
392 study effects are non-normally distributed: a simulation study. *Stat Methods Med Res*.  
393 2012;21(4):409–26.
- 394 32. Abioye AI, Bromage S, Fawzi W. Effect of micronutrient supplements on influenza and  
395 other respiratory tract infections among adults: a systematic review and meta-analysis. *BMJ*  
396 *Glob Health*. 2021 Jan;6(1).
- 397 33. Higgins JPT, Altman DG, Gøtzsche PC, Jüni P, Moher D, Oxman AD, et al. The Cochrane  
398 Collaboration’s tool for assessing risk of bias in randomised trials. *BMJ*. 2011 Oct  
399 18;343:d5928.
- 400 34. Egger M, Davey Smith G, Schneider M, Minder C. Bias in meta-analysis detected by a  
401 simple, graphical test. *BMJ*. 1997 Sep 13;315(7109):629–34.
- 402 35. Viechtbauer W, Viechtbauer MW. Package ‘metafor.’ *Compr R Arch Netw Package*  
403 ‘metafor’ [Httpcran R-Proj Orgwebpackagesmetaformetafor Pdf](https://cran.r-project.org/web/packages/metafor/metafor.pdf). 2015;
- 404 36. Allaire J. *RStudio: integrated development environment for R*. Boston MA.  
405 2012;770(394):165–71.

- 406 37. Nature Index [Internet]. 2023 [cited 2023 Aug 29]. Kaduna Infant Development (KID) Birth  
407 Cohort Study Project. Available from: [https://www.nature.com/nature-index-](https://www.nature.com/nature-index/institution-outputs/Nigeria/Kaduna%20Infant%20Development%20%28KID%29%20Birth%20Cohort%20Study%20Project/648bc90deb58ff99320deb8a)  
408 [outputs/Nigeria/Kaduna%20Infant%20Development%20%28KID%29%20Birth%20Cohort](https://www.nature.com/nature-index/institution-outputs/Nigeria/Kaduna%20Infant%20Development%20%28KID%29%20Birth%20Cohort%20Study%20Project/648bc90deb58ff99320deb8a)  
409 [%20Study%20Project/648bc90deb58ff99320deb8a](https://www.nature.com/nature-index/institution-outputs/Nigeria/Kaduna%20Infant%20Development%20%28KID%29%20Birth%20Cohort%20Study%20Project/648bc90deb58ff99320deb8a)
- 410 38. Müller-Staub M, Lunney M, Lavin MA, Needham I, Odenbreit M, van Achterberg T.  
411 Testing the Q-DIO as an instrument to measure the documented quality of nursing diagnoses,  
412 interventions, and outcomes. *Int J Nurs Terminol Classif Off J NANDA Int.* 2008  
413 Mar;19(1):20–7.
- 414 39. Becker H, Oskam S, Okkes I, van Boven K, Lamberts H. ICPC2-ICD10 Thesaurus. A  
415 diagnostic terminology for semi-automatic double coding in Electronic Patient records. In:  
416 ICPC in the Amsterdam transition project. Amsterdam: Academic Medical Center/University  
417 of Amsterdam Department of Family Medicine; 2005.
- 418 40. Pai MM, Ganiga R, Pai RM, Sinha RK. Standard electronic health record (EHR) framework  
419 for Indian healthcare system. *Health Serv Outcomes Res Methodol.* 2021;21(3):339–62.
- 420 41. Nordo AH, Levoux HP, Becnel LB, Galvez J, Rao P, Stem K, et al. Use of EHRs data for  
421 clinical research: historical progress and current applications. *Learn Health Syst.*  
422 2019;3(1):e10076.
- 423 42. Yi M. Major Issues in Adoption of Electronic Health Records. *J Digit Inf Manag.* 2018 Aug  
424 1;16(4):180.
- 425 43. Umezurike IS. Exploring the Adoption of Electronic Medical Records in Primary Health  
426 Care Centres in Calabar Municipality: The Challenges and Prospects of E-Governance. *J*  
427 *Good Gov Sustain Dev Afr.* 2021;6(2):70–80.

- 428 44. Gillum RF. From papyrus to the electronic tablet: a brief history of the clinical medical  
429 record with lessons for the digital age. *Am J Med.* 2013 Oct;126(10):853–7.
- 430 45. Mesko B, Györfy Z. The rise of the empowered physician in the digital health era. *J Med*  
431 *Internet Res.* 2019;21(3):e12490.
- 432 46. Moy AJ, Schwartz JM, Chen R, Sadri S, Lucas E, Cato KD, et al. Measurement of clinical  
433 documentation burden among physicians and nurses using electronic health records: a  
434 scoping review. *J Am Med Inform Assoc.* 2021;28(5):998–1008.
- 435 47. Liu J, Luo L, Zhang R, Huang T. Patient satisfaction with electronic medical/health record: a  
436 systematic review. *Scand J Caring Sci.* 2013;27(4):785–91.
- 437 48. Wali R, Alqahtani R, Alharazi S, Bukhari S, Quqandi S. Patient satisfaction with the  
438 implementation of electronic medical Records in the Western Region, Saudi Arabia, 2018.  
439 *BMC Fam Pract.* 2020;21(1):1–6.
- 440 49. Ogunbekun I, Ogunbekun A, Oroboton N. Private health care in Nigeria: walking the  
441 tightrope. *Health Policy Plan.* 1999;14(2):174–81.
- 442 50. Makinde OA, Sule A, Ayankogbe O, Boone D. Distribution of health facilities in Nigeria:  
443 implications and options for universal health coverage. *Int J Health Plann Manage.*  
444 2018;33(4):e1179–92.
- 445 51. Coorevits P, Sundgren M, Klein GO, Bahr A, Claerhout B, Daniel C, et al. Electronic health  
446 records: new opportunities for clinical research. *J Intern Med.* 2013;274(6):547–60.
- 447 52. Kotecha D, Asselbergs FW, Achenbach S, Anker SD, Atar D, Baigent C, et al. CODE-EHR  
448 best-practice framework for the use of structured electronic health-care records in clinical  
449 research. *Lancet Digit Health.* 2022;
- 450
- 451
